# Supplementary material
Source: PubMed Central journal article supplement (PMC5849054)

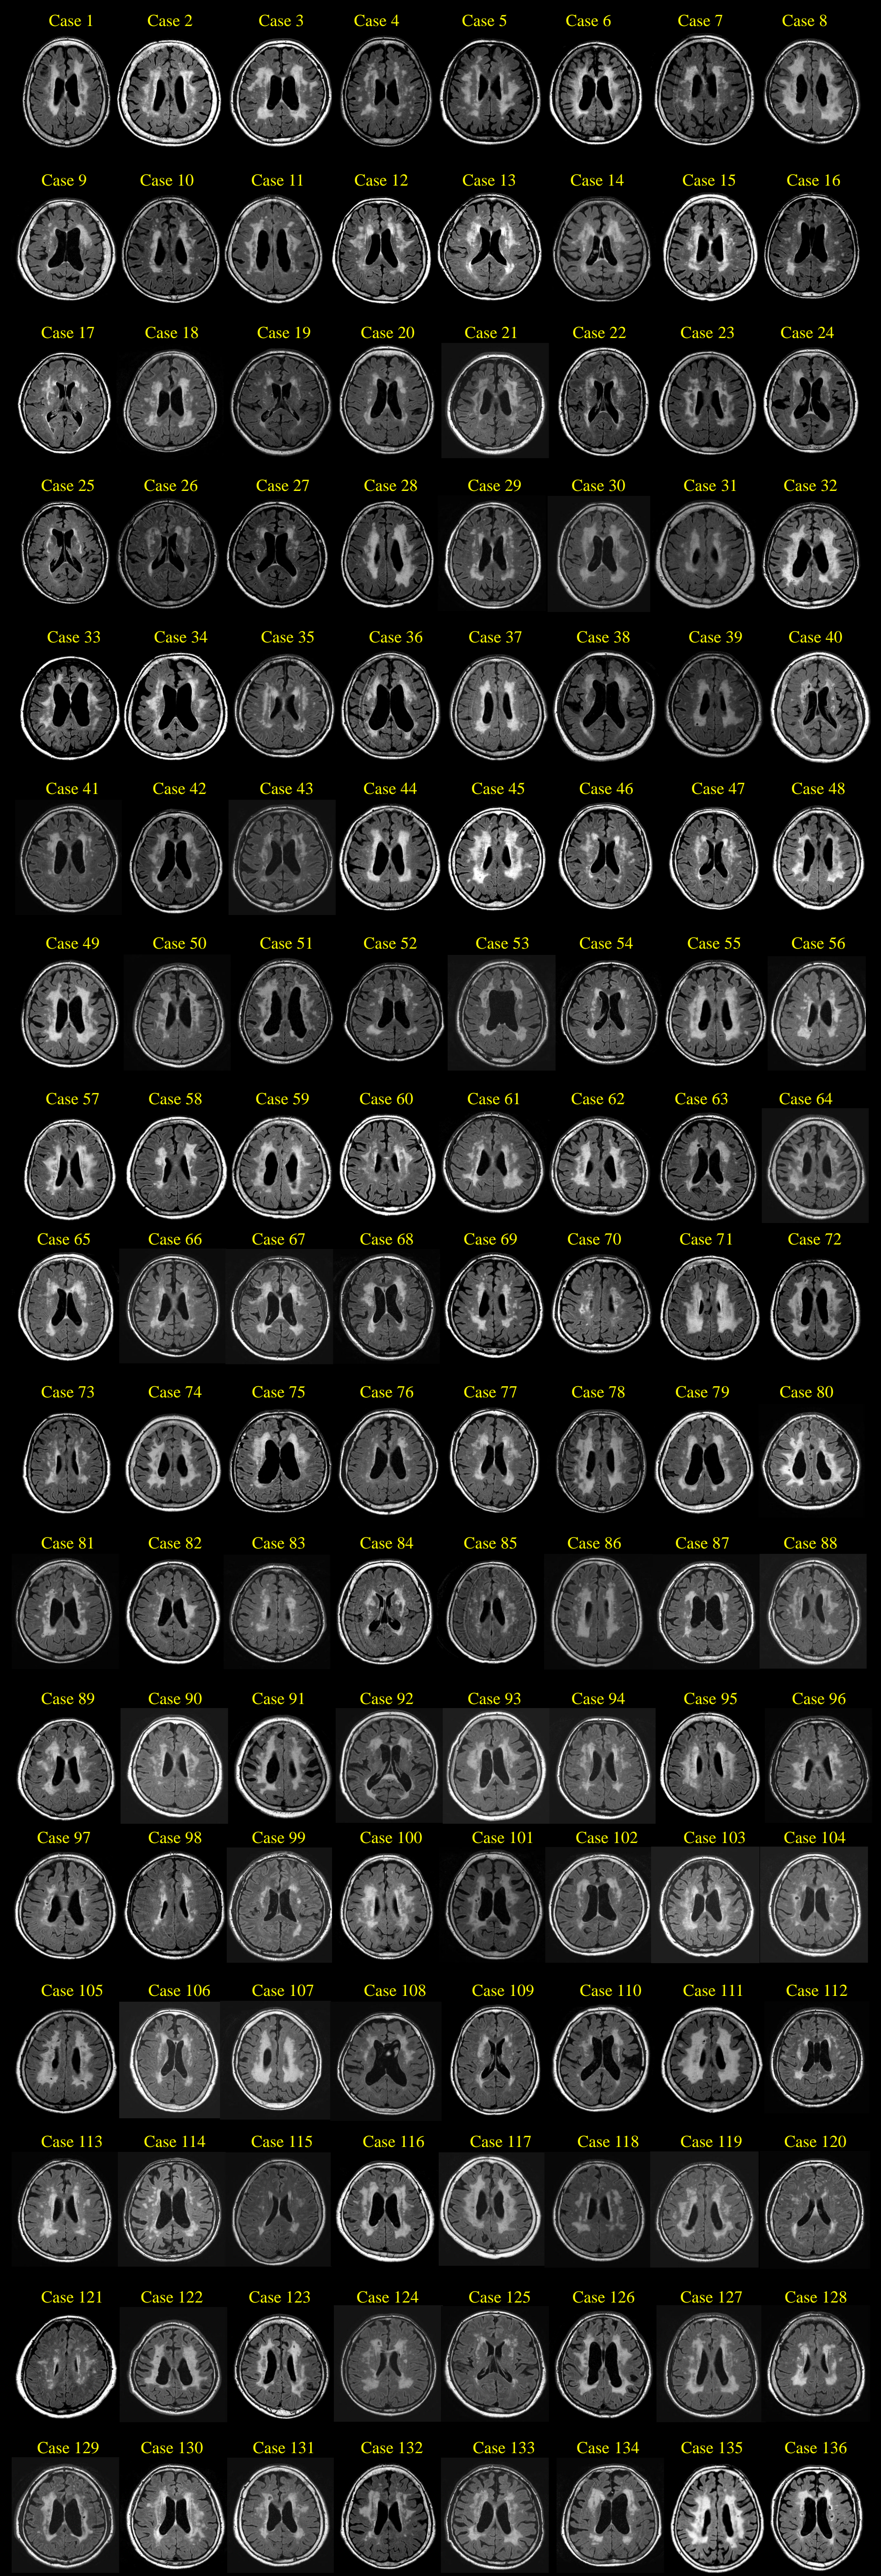

Supplement: NIHMS935927-supplement-fig.pdf [file NIHMS935927-supplement-fig.pdf]
